# Supplementary material
Source: publisher figshare collection journal article supplement (https://osapublishing.figshare.com/ndownloader/files/31075888)
Supplement: Supplementary file 1 [file 31075888]

# High-performance broadband position-sensitive detector based on lateral photovoltaic effect of PbSe heterostructure: supplement

JIKUI MA,<sup>1,4</sup> MINGJING CHEN,<sup>1,2,3,4</sup> SHUANG QIAO,<sup>1,5</sup>  
GUANGSHENG FU,<sup>1</sup> AND SHUFANG WANG<sup>1,6</sup>

<sup>1</sup>Hebei Key Laboratory of Optic-Electronic Information and Materials, College of Physics Science and Technology, Hebei University, Baoding 071002, China

<sup>2</sup>National & Local Joint Engineering Research Center of Metrology Instrument and System, College of Quality and Technical Supervision, Hebei University, Baoding 071002, China

<sup>3</sup>Postdoctoral Research Station of Optical Engineering, The College of Physics Science and Technology, Hebei University, Baoding 071002, China

<sup>4</sup>Equal contributor

<sup>5</sup>[sqiao@hbu.edu.cn](mailto:sqiao@hbu.edu.cn)

<sup>6</sup>[sfwang@hbu.edu.cn](mailto:sfwang@hbu.edu.cn)

---

This supplement published with Optica Publishing Group on 13 October 2021 by The Authors under the terms of the [Creative Commons Attribution 4.0 License](https://creativecommons.org/licenses/by/4.0/) in the format provided by the authors and unedited. Further distribution of this work must maintain attribution to the author(s) and the published article's title, journal citation, and DOI.

Supplement DOI: <https://doi.org/10.6084/m9.figshare.16745353>

Parent Article DOI: <https://doi.org/10.1364/OE.439796>

# High-performance broadband position-sensitive detector based on lateral photovoltaic effect of PbSe heterostructure

JIKUI MA,<sup>1,4</sup> MINGJING CHEN,<sup>1,2,3,4</sup> SHUANG QIAO,<sup>1,5</sup> GUANGSHENG FU<sup>1</sup>  
AND SHUFANG WANG<sup>1,6</sup>

<sup>1</sup>Hebei Key Laboratory of Optic-Electronic Information and Materials, College of Physics Science and Technology, Hebei University, Baoding 071002, China

<sup>2</sup>National & Local Joint Engineering Research Center of Metrology Instrument and System, College of Quality and Technical Supervision, Hebei University, Baoding 071002, China

<sup>3</sup>Postdoctoral Research Station of Optical Engineering, The College of Physics Science and Technology, Hebei University, Baoding 071002, China

<sup>4</sup>Equal contributor

<sup>5</sup>[sqiao@hbu.edu.cn](mailto:sqiao@hbu.edu.cn)

<sup>6</sup>[sfwang@hbu.edu.cn](mailto:sfwang@hbu.edu.cn)

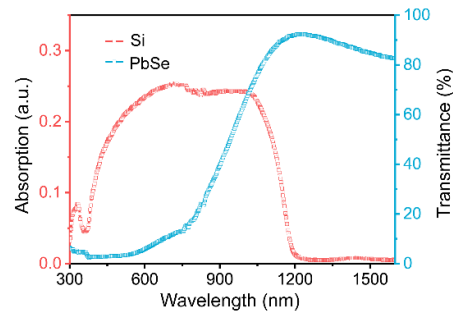

Fig. S1. Absorption spectrum of the Si substrate and transmittance of the PbSe film.

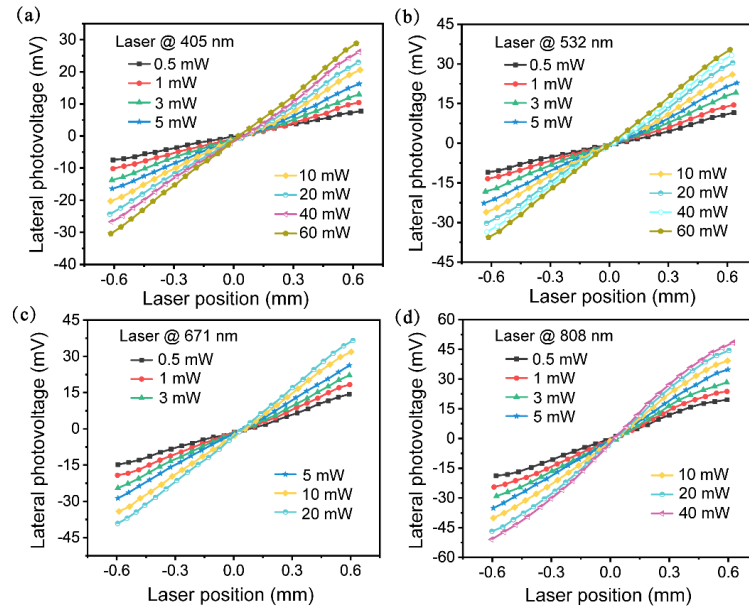

Fig. S2. Dependence of the LPV on the laser position under illumination of different laser powers for different laser wavelengths. (a) 405 nm, (b) 532 nm, (c) 671 nm, (d) 808nm, respectively.

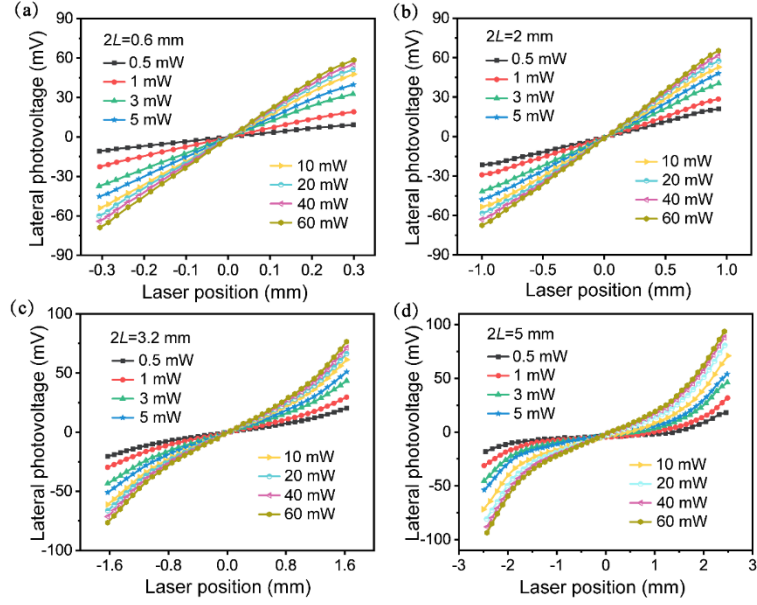

Fig. S3. Dependent of the LPV on the laser position under illumination of different laser powers for different electrode distances. (a)  $2L=0.6$  mm, (b)  $2L=2$  mm, (c)  $2L=3.2$  mm, (d)  $2L=5$  mm, respectively.

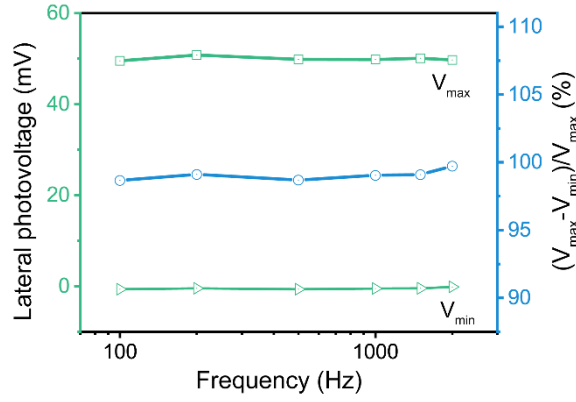

Fig. S4.  $V_{\max}$ ,  $V_{\min}$  extracted from time dependent lateral photovoltages measurement, and relative balance  $(V_{\max} - V_{\min})/V_{\max}$  versus chopper frequency.
